# Supplementary material
Source: PubMed Central journal article supplement (PMC8299463)
Supplement: NIHMS1722391-supplement-Supplemental_Material.pdf [file NIHMS1722391-supplement-Supplemental_Material.pdf]

## New Phytologist Supporting Information:

**Article Title:** miR156-mediated changes in leaf composition lead to altered photosynthetic traits during vegetative phase change

**Authors:** Erica H. Lawrence, Clint J. Springer, Brent R. Helliker, and R. Scott Poethig

**Accepted:** 6 October 2020

**Table S1.** Linear fit between photosynthetic rates and leaf composition traits depicted in figure 5.

| Species                  | Traits                                            | Slope   | $\gamma$ -intercept | $r^2$ | $p$ -value |
|--------------------------|---------------------------------------------------|---------|---------------------|-------|------------|
| <i>P. tremula x alba</i> | $A_{\text{sat}}$ Area vs. SLA                     | -0.021  | 20.41               | 0.167 | <0.0001    |
|                          | $A_{\text{sat}}$ Area vs. N ( $\text{g m}^{-2}$ ) | 0.1911  | -2.948              | 0.637 | <0.0001    |
| <i>A. thaliana</i>       | $A_{\text{sat}}$ Area vs. SLA                     | -0.0046 | 9.049               | 0.709 | <0.0001    |
|                          | $A_{\text{sat}}$ Area vs. N ( $\text{g m}^{-2}$ ) | 0.02324 | 2.867               | 0.629 | <0.01      |
| <i>Zea mays</i>          | $A_{\text{sat}}$ Mass vs. SLA                     | 0.0027  | 0.0119              | 0.485 | <0.0001    |
|                          | $A_{\text{sat}}$ Mass vs. N ( $\text{g g}^{-1}$ ) | 0.425   | -0.108              | 0.503 | <0.0001    |

**Table S2.** Additional leaf traits for adult, juvenile and juvenilized leaves of *P. tremula x alba*, *A. thaliana* and *Zea mays*. *P*-values determined by one-way ANOVA with developmental stage as the effect variable and corrected for multiple testing using false-discovery rate. Student's *T*-test was conducted on traits where *p* < 0.05, means significantly different from each other depicted by different lowercase letters.

| Trait                                                            | Species                                                           | Developmental Stage      | Mean ± SE        | N             | df | <i>p</i> -value |        |
|------------------------------------------------------------------|-------------------------------------------------------------------|--------------------------|------------------|---------------|----|-----------------|--------|
| Chl <sub>a+b</sub><br>(µg mg <sup>-1</sup> FW)                   | <i>P. tremula x alba</i>                                          | Adult                    | 12.35 ± 1.01     | 20            | 3  | 0.5179          |        |
|                                                                  |                                                                   | Juvenile                 | 15.02 ± 1.58     | 13            |    |                 |        |
|                                                                  |                                                                   | Juvenilized-40           | 19.27 ± 3.38     | 20            |    |                 |        |
|                                                                  |                                                                   | Juvenilized-78           | 21.72 ± 6.59     | 20            |    |                 |        |
|                                                                  | <i>A. thaliana</i>                                                | Adult                    | 1.65 ± 0.29      | 6             | 2  | 0.3691          |        |
|                                                                  |                                                                   | Juvenile                 | 2.23 ± 0.49      | 6             |    |                 |        |
|                                                                  |                                                                   | Juvenilized              | 3.93 ± 1.63      | 5             |    |                 |        |
|                                                                  | <i>Zea mays</i>                                                   | Adult                    | 34.99 ± 3.65     | 33            | 2  | 0.2069          |        |
|                                                                  |                                                                   | Juvenile                 | 28.84 ± 4.98     | 34            |    |                 |        |
|                                                                  |                                                                   | Juvenilized              | 51.69 ± 13.71    | 32            |    |                 |        |
|                                                                  | Chl a:b ratio                                                     | <i>P. tremula x alba</i> | Adult            | 1.17 ± 0.05 a | 20 | 3               | <0.001 |
|                                                                  |                                                                   |                          | Juvenile         | 0.93 ± 0.06 b | 13 |                 |        |
| Juvenilized-40                                                   |                                                                   |                          | 0.99 ± 0.03 b    | 20            |    |                 |        |
| Juvenilized-78                                                   |                                                                   |                          | 0.99 ± 0.02 b    | 20            |    |                 |        |
| <i>A. thaliana</i>                                               |                                                                   | Adult                    | 1.76 ± 0.07      | 6             | 2  | 0.1227          |        |
|                                                                  |                                                                   | Juvenile                 | 1.47 ± 0.08      | 6             |    |                 |        |
|                                                                  |                                                                   | Juvenilized              | 1.46 ± 0.11      | 5             |    |                 |        |
| <i>Zea mays</i>                                                  |                                                                   | Adult                    | 0.97 ± 0.05 a    | 33            | 2  | <0.01           |        |
|                                                                  |                                                                   | Juvenile                 | 1.24 ± 0.04 b    | 34            |    |                 |        |
|                                                                  |                                                                   | Juvenilized              | 1.20 ± 0.05 b    | 32            |    |                 |        |
| V <sub>cm</sub> Mass*<br>(µmol g <sup>-1</sup> s <sup>-1</sup> ) |                                                                   | <i>P. tremula x alba</i> | Adult            | 1.59 ± 0.20   | 15 | 3               | 0.2641 |
|                                                                  |                                                                   |                          | Juvenile         | 2.04 ± 0.21   | 12 |                 |        |
|                                                                  | Juvenilized-40                                                    |                          | 2.35 ± 0.44      | 13            |    |                 |        |
|                                                                  | Juvenilized-78                                                    |                          | 1.57 ± 0.30      | 14            |    |                 |        |
|                                                                  | <i>A. thaliana</i>                                                | Adult                    | 0.002 ± 0.0001 a | 7             | 2  | <0.05           |        |
|                                                                  |                                                                   | Juvenile                 | 0.005 ± 0.0010 b | 7             |    |                 |        |
|                                                                  |                                                                   | Juvenilized              | 0.003 ± 0.0002 a | 6             |    |                 |        |
|                                                                  | <i>Zea mays</i>                                                   | Adult                    | 1.66 ± 0.12 a    | 5             | 2  | <0.05           |        |
|                                                                  |                                                                   | Juvenile                 | 2.46 ± 0.08 b    | 6             |    |                 |        |
|                                                                  |                                                                   | Juvenilized              | 1.76 ± 0.25 a    | 6             |    |                 |        |
|                                                                  | J <sub>max</sub> Mass*<br>(µmol g <sup>-1</sup> s <sup>-1</sup> ) | <i>P. tremula x alba</i> | Adult            | 2.47 ± 0.31   | 15 | 3               | 0.1790 |
|                                                                  |                                                                   |                          | Juvenile         | 3.49 ± 0.33   | 12 |                 |        |
| Juvenilized-40                                                   |                                                                   |                          | 3.65 ± 0.67      | 13            |    |                 |        |
| Juvenilized-78                                                   |                                                                   |                          | 2.39 ± 0.48      | 14            |    |                 |        |
| <i>A. thaliana</i>                                               |                                                                   | Adult                    | 0.004 ± 0.0006 a | 7             | 2  | <0.05           |        |
|                                                                  |                                                                   | Juvenile                 | 0.012 ± 0.0024 b | 7             |    |                 |        |
|                                                                  |                                                                   | Juvenilized              | 0.006 ± 0.0006 a | 6             |    |                 |        |
| <i>Zea mays</i>                                                  |                                                                   | Adult                    | 9.55 ± 0.82      | 5             | 2  | 0.0897          |        |
|                                                                  |                                                                   | Juvenile                 | 14.34 ± 0.60     | 6             |    |                 |        |
|                                                                  |                                                                   | Juvenilized              | 9.22 ± 1.70      | 6             |    |                 |        |
| Φ                                                                |                                                                   | <i>P. tremula x alba</i> | Adult            | 0.06 ± 0.002  | 19 | 3               | 0.9793 |
|                                                                  |                                                                   |                          | Juvenile         | 0.06 ± 0.003  | 14 |                 |        |
|                                                                  | Juvenilized-40                                                    |                          | 0.06 ± 0.007     | 20            |    |                 |        |
|                                                                  | Juvenilized-78                                                    |                          | 0.06 ± 0.003     | 20            |    |                 |        |
|                                                                  | <i>A. thaliana</i>                                                | Adult                    | 0.05 ± 0.006     | 6             | 2  | 0.4135          |        |
|                                                                  |                                                                   | Juvenile                 | 0.12 ± 0.041     | 7             |    |                 |        |

|                                                 |                          |                |                 |    |   |        |
|-------------------------------------------------|--------------------------|----------------|-----------------|----|---|--------|
|                                                 |                          | Juvenilized    | 0.11 ± 0.026    | 7  |   |        |
|                                                 | <i>Zea mays</i>          | Adult          | 0.06 ± 0.001    | 35 | 2 | 0.0592 |
|                                                 |                          | Juvenile       | 0.07 ± 0.003    | 37 |   |        |
|                                                 |                          | Juvenilized    | 0.07 ± 0.001    | 32 |   |        |
| LCP<br>( $\mu\text{mol m}^{-2} \text{s}^{-1}$ ) | <i>P. tremula x alba</i> | Adult          | 9.91 ± 1.14 a   | 19 | 3 | <0.05  |
|                                                 |                          | Juvenile       | 9.80 ± 1.27 a   | 14 |   |        |
|                                                 |                          | Juvenilized-40 | 5.09 ± 1.51 b   | 20 |   |        |
|                                                 |                          | Juvenilized-78 | 5.94 ± 1.17 b   | 20 |   |        |
|                                                 | <i>A. thaliana</i>       | Adult          | 5.10 ± 3.90     | 6  | 2 | 0.3443 |
|                                                 |                          | Juvenile       | 16.21 ± 4.06    | 6  |   |        |
|                                                 |                          | Juvenilized    | 16.90 ± 6.59    | 7  |   |        |
|                                                 | <i>Zea mays</i>          | Adult          | 15.59 ± 1.23    | 35 | 2 | 0.2326 |
|                                                 |                          | Juvenile       | 12.72 ± 1.20    | 37 |   |        |
|                                                 |                          | Juvenilized    | 14.58 ± 0.77    | 32 |   |        |
| Fv/Fm                                           | <i>P. tremula x alba</i> | Adult          | 0.79 ± 0.006 a  | 20 | 3 | <0.05  |
|                                                 |                          | Juvenile       | 0.74 ± 0.012 b  | 14 |   |        |
|                                                 |                          | Juvenilized-40 | 0.75 ± 0.011 b  | 20 |   |        |
|                                                 |                          | Juvenilized-78 | 0.76 ± 0.011 b  | 20 |   |        |
|                                                 | <i>A. thaliana</i>       | Adult          | 0.77 ± 0.008    | 6  | 2 | 0.7133 |
|                                                 |                          | Juvenile       | 0.77 ± 0.006    | 7  |   |        |
|                                                 |                          | Juvenilized    | 0.76 ± 0.008    | 7  |   |        |
|                                                 | <i>Zea mays</i>          | Adult          | 0.76 ± 0.004    | 32 | 2 | 0.4904 |
|                                                 |                          | Juvenile       | 0.75 ± 0.004    | 37 |   |        |
|                                                 |                          | Juvenilized    | 0.76 ± 0.003    | 31 |   |        |
| Fv'/Fm'                                         | <i>P. tremula x alba</i> | Adult          | 0.47 ± 0.019    | 19 | 3 | 0.5592 |
|                                                 |                          | Juvenile       | 0.46 ± 0.010    | 14 |   |        |
|                                                 |                          | Juvenilized-40 | 0.44 ± 0.015    | 19 |   |        |
|                                                 |                          | Juvenilized-78 | 0.45 ± 0.009    | 19 |   |        |
|                                                 | <i>A. thaliana</i>       | Adult          | 0.51 ± 0.006    | 6  | 2 | 0.3191 |
|                                                 |                          | Juvenile       | 0.51 ± 0.012    | 7  |   |        |
|                                                 |                          | Juvenilized    | 0.53 ± 0.008    | 7  |   |        |
|                                                 | <i>Zea mays</i>          | Adult          | 0.47 ± 0.009 a  | 32 | 2 | <0.05  |
|                                                 |                          | Juvenile       | 0.44 ± 0.010 b  | 37 |   |        |
|                                                 |                          | Juvenilized    | 0.47 ± 0.006 a  | 32 |   |        |
| $\Phi$ PSII                                     | <i>P. tremula x alba</i> | Adult          | 0.13 ± 0.010 a  | 19 | 3 | <0.01  |
|                                                 |                          | Juvenile       | 0.12 ± 0.010 ab | 14 |   |        |
|                                                 |                          | Juvenilized-40 | 0.09 ± 0.007 c  | 19 |   |        |
|                                                 |                          | Juvenilized-78 | 0.11 ± 0.007 bc | 21 |   |        |
|                                                 | <i>A. thaliana</i>       | Adult          | 0.11 ± 0.014    | 6  | 2 | 0.3191 |
|                                                 |                          | Juvenile       | 0.08 ± 0.010    | 7  |   |        |
|                                                 |                          | Juvenilized    | 0.09 ± 0.011    | 7  |   |        |
|                                                 | <i>Zea mays</i>          | Adult          | 0.17 ± 0.004    | 32 | 2 | 0.3662 |
|                                                 |                          | Juvenile       | 0.17 ± 0.007    | 37 |   |        |
|                                                 |                          | Juvenilized    | 0.18 ± 0.008    | 32 |   |        |
| NPQ                                             | <i>P. tremula x alba</i> | Adult          | 3.42 ± 0.94     | 19 | 3 | 0.2641 |
|                                                 |                          | Juvenile       | 5.30 ± 0.89     | 14 |   |        |
|                                                 |                          | Juvenilized-40 | 4.72 ± 0.80     | 19 |   |        |
|                                                 |                          | Juvenilized-78 | 5.84 ± 0.82     | 21 |   |        |
|                                                 | <i>A. thaliana</i>       | Adult          | 5.76 ± 1.07 a   | 6  | 2 | <0.05  |
|                                                 |                          | Juvenile       | 0.43 ± 0.49 b   | 6  |   |        |
|                                                 |                          | Juvenilized    | 3.92 ± 0.94 a   | 7  |   |        |
|                                                 | <i>Zea mays</i>          | Adult          | 2.96 ± 0.52     | 32 | 2 | 0.6679 |
|                                                 |                          | Juvenile       | 2.95 ± 0.48     | 37 |   |        |
|                                                 |                          | Juvenilized    | 3.83 ± 0.56     | 32 |   |        |

|                                                                  |                          |                     |                     |    |        |         |
|------------------------------------------------------------------|--------------------------|---------------------|---------------------|----|--------|---------|
| ETR<br>( $\mu\text{mol m}^{-2} \text{s}^{-1}$ )                  | <i>P. tremula x alba</i> | Adult               | 87.45 $\pm$ 6.32 a  | 19 | 3      | <0.01   |
|                                                                  |                          | Juvenile            | 81.91 $\pm$ 5.86 a  | 14 |        |         |
|                                                                  |                          | Juvenilized-40      | 60.08 $\pm$ 4.45 b  | 19 |        |         |
|                                                                  |                          | Juvenilized-78      | 69.60 $\pm$ 4.62 ab | 21 |        |         |
| <i>A. thaliana</i>                                               | Adult                    | 48.15 $\pm$ 6.21    | 6                   | 2  | 0.3191 |         |
|                                                                  | Juvenile                 | 35.17 $\pm$ 3.83    | 7                   |    |        |         |
|                                                                  | Juvenilized              | 40.45 $\pm$ 4.68    | 7                   |    |        |         |
| <i>Zea mays</i>                                                  | Adult                    | 135.18 $\pm$ 3.37   | 32                  | 2  | 0.3662 |         |
|                                                                  | Juvenile                 | 132.85 $\pm$ 5.60   | 37                  |    |        |         |
|                                                                  | Juvenilized              | 143.49 $\pm$ 6.02   | 32                  |    |        |         |
| ETR Mass<br>( $\mu\text{mol g}^{-1} \text{s}^{-1}$ )             | <i>P. tremula x alba</i> | Adult               | 3.22 $\pm$ 0.23 a   | 18 | 3      | <0.01   |
|                                                                  |                          | Juvenile            | 4.33 $\pm$ 0.30 b   | 14 |        |         |
|                                                                  |                          | Juvenilized-40      | 2.96 $\pm$ 0.25 a   | 19 |        |         |
|                                                                  |                          | Juvenilized-78      | 3.12 $\pm$ 0.18 a   | 21 |        |         |
| <i>A. thaliana</i>                                               | Adult                    | 2.04 $\pm$ 0.33     | 6                   | 2  | 0.0876 |         |
|                                                                  | Juvenile                 | 3.83 $\pm$ 0.57     | 7                   |    |        |         |
|                                                                  | Juvenilized              | 2.57 $\pm$ 0.33     | 7                   |    |        |         |
| <i>Zea mays</i>                                                  | Adult                    | 6.63 $\pm$ 0.20 a   | 32                  | 2  | <0.001 |         |
|                                                                  | Juvenile                 | 8.87 $\pm$ 0.47 b   | 25                  |    |        |         |
|                                                                  | Juvenilized              | 9.81 $\pm$ 0.35 b   | 32                  |    |        |         |
| $R_{\text{day}}$<br>( $\mu\text{mol m}^{-2} \text{s}^{-1}$ )     | <i>P. tremula x alba</i> | Adult               | -0.78 $\pm$ 0.22    | 21 | 3      | 0.9793  |
|                                                                  |                          | Juvenile            | -0.77 $\pm$ 0.14    | 14 |        |         |
|                                                                  |                          | Juvenilized-40      | -0.84 $\pm$ 0.17    | 19 |        |         |
|                                                                  |                          | Juvenilized-78      | -0.89 $\pm$ 0.18    | 20 |        |         |
| <i>A. thaliana</i>                                               | Adult                    | -1.20 $\pm$ 0.44    | 6                   | 2  | 0.4135 |         |
|                                                                  | Juvenile                 | -1.41 $\pm$ 0.68    | 7                   |    |        |         |
|                                                                  | Juvenilized              | -0.23 $\pm$ 0.57    | 7                   |    |        |         |
| <i>Zea mays</i>                                                  | Adult                    | -0.86 $\pm$ 0.13    | 31                  | 2  | 0.2351 |         |
|                                                                  | Juvenile                 | -0.42 $\pm$ 0.12    | 19                  |    |        |         |
|                                                                  | Juvenilized              | -0.84 $\pm$ 0.20    | 32                  |    |        |         |
| $g_{\text{High Light}}$<br>( $\text{mol m}^{-2} \text{s}^{-1}$ ) | <i>P. tremula x alba</i> | Adult               | 0.195 $\pm$ 0.020 a | 19 | 3      | <0.0001 |
|                                                                  |                          | Juvenile            | 0.200 $\pm$ 0.021 a | 14 |        |         |
|                                                                  |                          | Juvenilized-40      | 0.087 $\pm$ 0.013 b | 20 |        |         |
|                                                                  |                          | Juvenilized-78      | 0.083 $\pm$ 0.010 b | 20 |        |         |
| <i>A. thaliana</i>                                               | Adult                    | 0.103 $\pm$ 0.012   | 6                   | 2  | 0.1999 |         |
|                                                                  | Juvenile                 | 0.060 $\pm$ 0.016   | 6                   |    |        |         |
|                                                                  | Juvenilized              | 0.098 $\pm$ 0.013   | 7                   |    |        |         |
| <i>Zea mays</i>                                                  | Adult                    | 0.164 $\pm$ 0.004   | 35                  | 2  | 0.4109 |         |
|                                                                  | Juvenile                 | 0.186 $\pm$ 0.012   | 37                  |    |        |         |
|                                                                  | Juvenilized              | 0.173 $\pm$ 0.007   | 32                  |    |        |         |
| $g_{\text{Low Light}}$<br>( $\text{mol m}^{-2} \text{s}^{-1}$ )  | <i>P. tremula x alba</i> | Adult               | 0.010 $\pm$ 0.015 a | 19 | 3      | <0.001  |
|                                                                  |                          | Juvenile            | 0.156 $\pm$ 0.020 b | 14 |        |         |
|                                                                  |                          | Juvenilized-40      | 0.068 $\pm$ 0.008 a | 20 |        |         |
|                                                                  |                          | Juvenilized-78      | 0.073 $\pm$ 0.008 a | 20 |        |         |
| <i>A. thaliana</i>                                               | Adult                    | 0.032 $\pm$ 0.002   | 6                   | 2  | 0.3191 |         |
|                                                                  | Juvenile                 | 0.030 $\pm$ 0.012   | 6                   |    |        |         |
|                                                                  | Juvenilized              | 0.052 $\pm$ 0.011   | 7                   |    |        |         |
| <i>Zea mays</i>                                                  | Adult                    | 0.044 $\pm$ 0.004 a | 35                  | 2  | <0.01  |         |
|                                                                  | Juvenile                 | 0.066 $\pm$ 0.007 b | 37                  |    |        |         |
|                                                                  | Juvenilized              | 0.042 $\pm$ 0.003 a | 32                  |    |        |         |

\* $V_{\text{cmax}}$  Mass and  $J_{\text{max}}$  Mass in *A. thaliana* and *Z. mays* were calculated using the mean SLA for the corresponding leaf number/developmental stage

**Table S3.** Statistical results for leaf traits depicted in figures 2, 3, 6 and 7. *P*-values determined by one-way ANOVA with developmental stage as the effect variable and two-way ANOVA with leaf position and genotype as the effect variables. All *p*-values corrected for multiple testing using false-discovery rate. Developmental stages are adult, juvenile and juvenilized; genotypes are wild-type and miR156 overexpressors and leaf positions are 2-11 in *Z. mays* and 10, 15, 20 and 25 in *P. tremula x alba*. Leaf position is shown to have an effect on a trait independent of developmental stage when  $p < 0.05$  for Leaf position but not for Leaf position x Genotype.

| Trait                           | Species                         | Effect                          | df                  | <i>p</i> -value |         |
|---------------------------------|---------------------------------|---------------------------------|---------------------|-----------------|---------|
| A <sub>sat</sub> Area           | <i>P. tremula x alba</i>        | Developmental Stage             | 3                   | <0.0001         |         |
|                                 |                                 | Leaf Position                   | 1                   | <0.01           |         |
|                                 |                                 | <i>Leaf Position x Genotype</i> | 1                   | <0.0001         |         |
|                                 | <i>A. thaliana</i>              | Developmental Stage             | 2                   | <0.05           |         |
|                                 | <i>Zea mays</i>                 | Developmental Stage             | 2                   | 0.0733          |         |
|                                 |                                 | Leaf Position                   | 1                   | <0.0001         |         |
|                                 |                                 | <i>Leaf Position x Genotype</i> | 1                   | 0.1282          |         |
|                                 | A <sub>sat</sub> Mass           | <i>P. tremula x alba</i>        | Developmental Stage | 3               | <0.0001 |
|                                 |                                 |                                 | Leaf Position       | 1               | <0.0001 |
| <i>Leaf Position x Genotype</i> |                                 |                                 | 1                   | <0.05           |         |
| <i>A. thaliana</i>              |                                 | Developmental Stage             | 2                   | 0.1227          |         |
| <i>Zea mays</i>                 |                                 | Developmental Stage             | 2                   | <0.0001         |         |
|                                 |                                 | Leaf Position                   | 1                   | <0.0001         |         |
|                                 |                                 | <i>Leaf Position x Genotype</i> | 1                   | <0.0001         |         |
| SLA                             |                                 | <i>P. tremula x alba</i>        | Developmental Stage | 3               | <0.0001 |
|                                 |                                 |                                 | Leaf Position       | 1               | <0.0001 |
|                                 | <i>Leaf Position x Genotype</i> |                                 | 1                   | <0.05           |         |
|                                 | <i>A. thaliana</i>              | Developmental Stage             | 2                   | <0.001          |         |
|                                 | <i>Zea mays</i>                 | Developmental Stage             | 2                   | <0.0001         |         |
|                                 |                                 | Leaf Position                   | 1                   | <0.0001         |         |
|                                 |                                 | <i>Leaf Position x Genotype</i> | 1                   | <0.01           |         |
|                                 | Mass-based Leaf Nitrogen        | <i>P. tremula x alba</i>        | Developmental Stage | 3               | <0.01   |
|                                 |                                 |                                 | Leaf Position       | 1               | <0.001  |
| <i>Leaf Position x Genotype</i> |                                 |                                 | 1                   | 0.1467          |         |
| <i>A. thaliana</i>              |                                 | Developmental Stage             | 2                   | 0.2781          |         |
| <i>Zea mays</i>                 |                                 | Developmental Stage             | 2                   | <0.0001         |         |
|                                 |                                 | Leaf Position                   | 1                   | <0.0001         |         |
|                                 |                                 | <i>Leaf Position x Genotype</i> | 1                   | <0.0001         |         |
| Area-based Leaf Nitrogen        |                                 | <i>P. tremula x alba</i>        | Developmental Stage | 3               | <0.0001 |
|                                 |                                 |                                 | Leaf Position       | 1               | 0.1641  |
|                                 | <i>Leaf Position x Genotype</i> |                                 | 1                   | <0.01           |         |
|                                 | <i>A. thaliana</i>              | Developmental Stage             | 2                   | <0.01           |         |
|                                 | <i>Zea mays</i>                 | Developmental Stage             | 2                   | 0.1524          |         |
|                                 |                                 | Leaf Position                   | 1                   | 0.2501          |         |
|                                 |                                 | <i>Leaf Position x Genotype</i> | 1                   | 0.3258          |         |
|                                 | A <sub>low light</sub> Area     | <i>P. tremula x alba</i>        | Developmental Stage | 3               | 0.7808  |
|                                 |                                 |                                 | Leaf Position       | 1               | 0.6630  |
| <i>Leaf Position x Genotype</i> |                                 |                                 | 1                   | 0.6630          |         |
| <i>A. thaliana</i>              |                                 | Developmental Stage             | 2                   | 0.6363          |         |
| <i>Zea mays</i>                 |                                 | Developmental Stage             | 2                   | <0.01           |         |
|                                 |                                 | Leaf Position                   | 1                   | 0.2501          |         |
|                                 |                                 | <i>Leaf Position x Genotype</i> | 1                   | 0.7828          |         |
| A <sub>low light</sub> Mass     |                                 | <i>P. tremula x alba</i>        | Developmental Stage | 3               | <0.05   |

|                   |                          |                                 |   |         |
|-------------------|--------------------------|---------------------------------|---|---------|
|                   |                          | Leaf Position                   | 1 | 0.3532  |
|                   |                          | <i>Leaf Position x Genotype</i> | 1 | 0.1075  |
|                   | <i>A. thaliana</i>       | Developmental Stage             | 2 | <0.05   |
|                   | <i>Zea mays</i>          | Developmental Stage             | 2 | <0.0001 |
|                   |                          | Leaf Position                   | 1 | <0.0001 |
|                   |                          | <i>Leaf Position x Genotype</i> | 1 | 0.3258  |
| $V_{\text{cmax}}$ | <i>P. tremula x alba</i> | Developmental Stage             | 3 | 0.1742  |
|                   |                          | Leaf Position                   | 1 | 0.1131  |
|                   |                          | <i>Leaf Position x Genotype</i> | 1 | 0.0684  |
|                   | <i>A. thaliana</i>       | Developmental Stage             | 2 | 0.7371  |
|                   | <i>Zea mays</i>          | Developmental Stage             | 2 | 0.0963  |
| $J_{\text{max}}$  | <i>P. tremula x alba</i> | Developmental Stage             | 3 | 0.0690  |
|                   |                          | Leaf Position                   | 1 | <0.05   |
|                   |                          | <i>Leaf Position x Genotype</i> | 1 | 0.0996  |
|                   | <i>A. thaliana</i>       | Developmental Stage             | 2 | 0.7133  |
|                   | <i>Zea mays</i>          | Developmental Stage             | 2 | <0.05   |
